# Supplementary material for: Behavioural change models for infectious disease transmission: a systematic review (2010–2015)
Source: J R Soc Interface. 2016 Dec;13(125):20160820. doi: 10.1098/rsif.2016.0820 (PMC5221530; doi:10.1098/rsif.2016.0820)
Supplement: References Database [file rsif20160820supp1.xlsx]

## Sheet: ReadMe
This file is an online appendix as a part of a systematic review by Verelst et al.: Behavioural change models for infectious disease transmission: a systematic review (2010-2015), Journal of The Royal Society Interface
In the 'Appendix' sheet,
we categorised the articles according to different definitions (filters can be used to browse papers):				Abbreviations:
Category (Column)	Definition
ID	The ID number of the paper (≠reference number in review article)			ILI	Influenza-like illness
Year	Year of publication			SARS	Severe Acute Respiratory Syndrome
Author	Author(s) of the paper			HIV	Human Immunodeficiency Virus
Title	Title of the paper			STD	Sexually Transmitted Disease
Journal	The journal where the paper is published			VBD	Vector Borne Disease
Disease	The disease that is central to analysis. 'Not specified' concerns papers that not explicitly specify a disease.			N/A	Not applicable
Category	Category to which a disease belongs. The 'Other' category contains papers with non-specified disease and papers modelling a disease not frequently observed in the BCM literature.			BCM	Behavioural Change Model
Prevention measure	Prevention measure taken by individuals to reduce the risk of transmission.
Source of information1	Source of information individuals use as input in their decision-making process. (i) Global: information on which people act is available to everyone (TV, media, newspapers and other media). (ii) Local: information is taken from the social or spatial neighbourhood only (word of mouth, assessment of disease prevalence among acquaintances and in local community etc.).
Type of information1	Type of information individuals use in their decision-making process. (i) Prevalence-based: directly relating to disease prevalence. (ii) Belief-based: not directly relating to disease prevalence, information whose dynamics are at least partially independent of the actual disease dynamics. E.g. Rumour
Effect on model1	The effect of the prevention measure has on the disease transmission model. (i) disease state (S,I,R of the individual), (ii) model parameters (the infection rate or the recovery rate) or (iii) contact structure (network structure relevant for the spread of disease)
Disease model specification	Model description used to model the spread of the disease. (i) Population-level, (ii) Individual-level or (iii) Metapopulation
BCM specification	How is the transfer from information to behaviour managed? (i) Exogenous behaviour formation, (ii) Information threshold, (iii) Information as dynamic parameter, (iv) An economic objective function or (v) An economic objective function with social learning/imitation
1: defined as in: Sebastian Funk, Marcel Salathé, and Vincent AA Jansen. Modelling the influence of human behaviour on the spread of infectious diseases: a review. Journal of the Royal Society Interface, 7(50):1247–1256, 2010.

## Sheet: Appendix
ID	Year	Author	Title	Journal	Disease	Category	Prevention measure	Source of information	Type of information	Effect on model	Disease model specification	BCM specification
1	2010	Barbagallo, A. & Cojocaru, M.-G.	Dynamic vaccination games and variational inequalities on time-dependent sets	Journal of Biological Dynamics	Not specified	Childhood diseases	Vaccination	local	Belief-based	Model parameters	Population level	Economic objective function
2	2010	Barrett, C. et al.	An Integrated Modeling Environment to Study the Coevolution of Networks, Individual Behavior, and Epidemics	Artificial Intelligence Magazine	Influenza	ILI	Social distancing	global	Prevalence-based	Model parameters	Individual level	Information threshold
3	2010	Bauch, C. et al.	Rapid Emergence of Free-Riding Behavior in New Pediatric Immunization Programs	PLoS ONE	Not specified	Childhood diseases	Vaccination	global	Multiple	Disease state	Population level	Economic objective function
4	2010	Bhattacharyya, S. & Bauch, C.	A game dynamic model for delayer strategies in vaccinating behaviour for pediatric infectious diseases	Journal of Theoretical Biology	Measles	Childhood diseases	Vaccination	global	Belief-based	Disease state	Population level	Economic objective function with imitation
5	2010	Buonomo, B. et al.	Rational exemption to vaccination for non-fatal SIS diseases: globally stable and oscillatory endemicity	Mathematical biosciences and engineering	Not specified	Other	Vaccination	global	Prevalence-based	Disease state	Population level	Information as dynamic parameter
6	2010	Chen, J. et al.	Coevolution of Epidemics, Social Networks, and Individual Behavior: A Case Study	Advances in Social Computing, Proceedings	ILI	ILI	Prophylactic antivirals & social distancing	global	Prevalence-based	Contact structure + Model parameters	Individual level	Information as dynamic parameter + information threshold
7	2010	d'Onofrio, A. & Manfredi, P.	Vaccine demand driven by vaccine side effects: Dynamic implications for SIR diseases	Journal of Theoretical Biology	Not specified	Childhood diseases	Vaccination	global	Prevalence-based	Disease state	Population level	Information as dynamic parameter
8	2010	Funk, S. et al.	Endemic disease, awareness, and local behavioural repsonse	Journal of Theoretical Biology	Not specified	Other	Hygiene measures & social distancing	local	Belief-based	Disease state	Population level	Information as dynamic parameter
9	2010	Kitchovitch, S. & Lio, P.	Risk perception and disease spread on social networks	Procedia Computer Science	Not specified	Other	General	Multiple	Prevalence-based	Model parameters	Individual level	Information as dynamic parameter
10	2010	Larson, R. & Nigmatulina, K.	Engineering responses to pandemics	Studies in health technology and informatics	Influenza	ILI	Hygiene measures & social distancing	Multiple	Prevalence-based	Model parameters	Population level	Information as dynamic parameter
11	2010	Milner, F. A.& Zhao, R.	A New Mathematical Model of Syphilis	Mathematical Modelling of Natural Phenomena	Syphilis	STD	Vaccination & safe sex habits	global	Belief-based	Model parameters	Population level	Information as dynamic parameter
12	2010	Morin, B. et al.	Static behavioral effects on gonorrhea transmission dynamics in a MSM population	Journal of Theoretical Biology	Gonorrhea	STD	Condom use	global	Prevalence-based	Model parameters	Population level	Exogenous
13	2010	Nyabadza, F. et al.	Analysis of an HIV/AIDS model with public-health information campaigns and individual withdrawal	Journal of biological systems	HIV	STD	Social distancing	global	Prevalence-based	Model parameters	Population level	Information as dynamic parameter
14	2010	Reluga, T. C.	Game Theory of Social Distancing in Response to an Epidemic	PLoS Computational Biology	Not specified	Other	Social distancing	global	Prevalence-based	Model parameters	Population level	Economic objective function
15	2010	Shaw, L. & Schwartz, I.	Enhanced vaccine control of epidemics in adaptive networks	Physical Review E	Not specified	Other	Social distancing	local	Prevalence-based	Contact structure	Individual level	Information threshold
16	2010	Van Segbroeck, S. et al.	Adaptive Contact Networks Change Effective Disease Infectiousness and Dynamics	PLoS Computational Biology	Not specified	Other	Social distancing	local	Prevalence-based	Contact structure	Individual level	Information threshold
17	2010	Vardavas, R. et al.	A universal long-term flu vaccine may not prevent severe epidemics	BMC Research Notes	Influenza	ILI	Vaccination	Multiple	Prevalence-based	Model parameters	Population level	Economic objective function
18	2010	Vieira et al.	Small world network models of the dynamics of HIV infection	Annals of Operational Research	HIV	STD	Condom use	global	Belief-based	Model parameters	Individual level	Exogenous
19	2011	Alimadad, A. et al.	Modelling HIV Spread Through Sexual Contact Using a Cellular Automaton	Congress on Evolutionary Computation	HIV	STD	Sexual risk taking	local	Belief-based	Disease state	Individual level	Information as dynamic parameter
20	2011	Barrett, C. et al.	Economic and Social Impact of Influenza Mitigation Strategies by Demographic Class	Epidemics	Influenza	ILI	Prophylactic antivirals & social distancing	Multiple	Prevalence-based	Model parameters	Individual level	Information threshold
21	2011	Bhattacharyya, S. & Bauch, C.	"Wait and see" vaccinating behaviour during a pandemic: A game theoretic analysis	Vaccine	Influenza	ILI	Vaccination	global	Belief-based	Disease state	Population level	Economic objective function
22	2011	Brauer, F.	A simple model for behaviour change in epidemics	BMC Public Health	Not specified	Other	Social distancing	Not specified	Not specified	Model parameters	Population level	Exogenous
23	2011	Breban, R.	Health Newscasts for Increasing Influenza Vaccination Coverage: An Inductive Reasoning Game Approach	PLoS ONE	Influenza	ILI	Vaccination	global	Multiple	Disease state	Population level	Economic objective function
24	2011	Cornforth, D. et al.	Erratic Flu Vaccination Emerges from Short-Sighted Behavior in Contact Networks	PLoS Computational Biology	Influenza	ILI	Vaccination	global	Belief-based	Disease state	Individual level	Economic objective function
25	2011	d'Onofrio, A. et al.	The impact of vaccine side effects on the natural history of immunization programmes: An imititation-game approach	Journal of Theoretical Biology	Not specified	Childhood diseases	Vaccination	global	Prevalence-based	Disease state	Population level	Economic objective function with imitation
26	2011	Fenichel, E. et al.	Adaptive human behavior in epidemiological models	PNAS	Not specified	Other	Social distancing	global	Prevalence-based	Model parameters	Population level	Economic objective function
27	2011	Fu, F. et al.	Imitation dynamics of vaccinating behaviour on social networks	Proceedings of the Royal Society B	ILI	ILI	Vaccination	local	Prevalence-based	Disease state	Individual level	Economic objective function with imitation
28	2011	Gray, R. et al.	Will Changes in Men's Sexual Behavior Reduce Syphilis Rates?	Sexually Transmitted Diseases	Syphilis	STD	Condom use & social distancing	global	Not specified	Model parameters	Individual level	Exogenous
29	2011	Hatzopoulos, V. et al.	Multiple sources and routes of information transmission: Implications for epidemic dynamics	Mathematical Biosciences	Not specified	Other	General	Multiple	Multiple	Disease state	Individual level	Information as dynamic parameter
30	2011	Kassa, S. & Ouhinou, A.	Epidemiological models with prevalence dependent endogenous self-protection measure	Mathematical Biosciences	HIV	STD	General	global	Prevalence-based	Disease state	Population level	Information threshold
31	2011	Kitchovitch, S. & Lio, P.	Community Structure in Social Networks: Applications for Epidemiological Modelling	PLoS ONE	Not specified	Other	General	Multiple	Prevalence-based	Model parameters	Individual level	Information as dynamic parameter
32	2011	Loganathan, P. et al.	Modeling information feedback during H1N1 outbreak using stochastic agent-based models	Asia-Pacific Journal of Chemical Engineering	Influenza	ILI	Vaccination	Multiple	Belief-based	Disease state	Individual level	Information as dynamic parameter
33	2011	Maharaj, S. et al.	A Participatory Simulation Model for Studying Attitudes to Infection Risk	Proceedings of the 2011 Summer Computer Simulation Conference	Not specified	Other	Social distancing	local	Prevalence-based	Contact structure	Individual level	Economic objective function
34	2011	Mao, L. & Bian, L.	Agent-based simulation for a dual-diffusion process of influenza and human preventive behavior	International Journal of Geographical Information Science	Influenza	ILI	Prophylactic antivirals	local	Multiple	Model parameters	Individual level	Information threshold
35	2011	Marathe, A. et al.	Comparing Effectiveness of Top-Down and Bottom-Up Strategies in Containing Influenza	PLoS ONE	Influenza	ILI	Prophylactic antivirals & vaccination	Multiple	Prevalence-based	Model parameters	Individual level	Information threshold
36	2011	Meloni, S. et al.	Modeling human mobility responses to large-scale spreading of infectious diseases	Scientific Reports	Not specified	Other	Social distancing	global	Prevalence-based	Model parameters	Metapopulation	Information as dynamic parameter + Economic objective function
37	2011	Misra, A. et al.	Effect of awareness programs in controlling the prevalence of an epidemic with time delay	Journal of Biological Dynamics	Not specified	Other	Social distancing	global	Prevalence-based	Disease state	Population level	Information as dynamic parameter
38	2011	Ni, S. et al.	Modeling the effects of social impact on epidemic spreading in complex networks	Physica A	Not specified	Other	General	Multiple	Belief-based	Model parameters	Individual level	Information as dynamic parameter
39	2011	Nyabadza, F. et al.	Modelling the HIV/AIDS epidemic trends in South Africa: Insights from a simple mathematical model	Nonlinear Analysis: Real World Applications	HIV	STD	Condom use & social distancing	global	Prevalence-based	Model parameters	Population level	Information as dynamic parameter
40	2011	Perra, N. et al.	Towards a Characterization of Behavior-Disease Models	PLoS ONE	SARS	Other	Social distancing	Multiple	Multiple	Disease state	Population level	Information as dynamic parameter
41	2011	Poletti, P. et al.	The Effect of Risk Perception on the 2009 H1N1 Pandemic Influenza Dynamics	PLoS ONE	Influenza	ILI	Hygiene measures & social distancing	global	Prevalence-based	Model parameters	Population level	Economic objective function with imitation
42	2011	Reluga, T. & Galvani, A.	A general approach for population games with application to vaccination	Mathematical Biosciences	Not specified	Other	Vaccination	global	Prevalence-based	Disease state	Population level	Economic objective function
43	2011	Sahneh, F. & Scoglio, C.	Epidemic Spread in Human Networks	50th Ieee Conference on Decision and Control and European Control Conference (Cdc-Ecc)	Not specified	Other	Social distancing	local	Prevalence-based	Disease state	Individual level	Information as dynamic parameter
44	2011	Schimit, P. & Monteiro, L.	A vaccination game based on public health actions and personal decisions	Ecological Modelling	Not specified	Other	Vaccination	Multiple	Prevalence-based	Disease state	Individual level	Economic objective function
45	2011	Sun, C. et al.	Effect of media-induced social distancing on disease transmission in a two patch setting	Mathematical Biosciences	Not specified	Other	Social distancing	global	Prevalence-based	Model parameters	Metapopulation	Information as dynamic parameter
46	2011	Wells, C. et al.	Impact of Imitation Processes on the Effectiveness of Ring Vaccination	Bulletin of mathematical biology	Not specified	Other	Vaccination	local	Prevalence-based	Disease state	Individual level	Economic objective function with imitation
47	2011	Williams, A. et al.	An individual-based simulation of pneumonic plague transmission following an outbreak and the significance of intervention compliance	Epidemics	Pneumonic plague	Other	Antibiotic prophylaxis	Global	Not specified	Disease state	Individual level	Exogenous
48	2011	Wu, B. et al.	Imperfect Vaccine Aggravates the Long-Standing Dilemma of Voluntary Vaccination	PLoS ONE	Not specified	Other	Vaccination	global	Prevalence-based	Disease state	Population level	Economic objective function with imitation
49	2011	Zhang, H. et al.	Risk estimation of infectious diseases determines the effectiveness of the control strategy	Physica D	Not specified	Other	Vaccination	global	Belief-based	Model parameters	Individual level	Economic objective function
50	2012	Bauch, C. & Bhattacharyya, S.	Evolutionary Game Theory and Social Learning Can Determine How Vaccine Scares Unfold	PLoS Computational Biology	Pertussis & Measles	Childhood diseases	Vaccination	global	Belief-based	Disease state	Population level	Economic objective function with imitation
51	2012	Buonomo, B. et al.	Globally stable endemicity for infectious diseases with information-related changes in contact patterns	Applied Mathematics Letters	Not specified	Other	Social distancing	global	Prevalence-based	Model parameters	Population level	Information as dynamic parameter
52	2012	Cooper, K. et al.	An economic model of school-based behavioral interventions to prevent sexually transmitted infections	International Journal of Technology Assessment Health Care	STD	STD	Condom use & social distancing	global	Belief-based	Model parameters	Population level	Exogenous
53	2012	d'Onofrio, A. et al.	The Interplay of Public Intervention and Private Choices in Determining the Outcome of Vaccination Programmes	PLoS ONE	Measles	Childhood diseases	Vaccination	Multiple	Belief-based	Disease state	Population level	Information as dynamic parameter
54	2012	Durham, D. & Casman, E.	Incorporating individual health-protective decisions into disease transmission models: a mathematical framework	Journal of the Royal Society Interface	SARS	Other	Hygiene measures	global	Belief-based	N/A	No disease transmission model	Information as dynamic parameter
55	2012	Johnson, L. F. et al.	The effect of changes in condom usage and antiretroviral treatment coverage on human immunodeficiency virus incidence in South Africa: a model-based analysis	Journal of the Royal Society Interface	HIV	STD	Condom use	global	Belief-based	Model parameters	Population level	Exogenous
56	2012	Jolad, S. et al.	Epidemic Spreading on Preferred Degree Adaptive Networks	PLoS ONE	Not specified	Other	Social distancing	global	Prevalence-based	Contact structure	Individual level	Information as dynamic parameter + information threshold
57	2012	Liu, X. et al.	Impact of committed individuals on vaccination behavior	Physical Review E	ILI	ILI	Vaccination	local	Belief-based	Disease state	Population level + Individual level	Economic objective function with imitation
58	2012	Liu, X. & Stechlinski, P.	Infectious disease models with time-varying parameters and general nonlinear incidence rate	Applied Mathematical Modelling	Not specified	Other	General	global	Prevalence-based	Model parameters	Population level	Information as dynamic parameter
59	2012	Maharaj, S. & Kleczkowski, A.	Controlling epidemic spread by social distancing: Do it well or not at all	BMC Public Health	Not specified	Other	Social distancing	Multiple	Prevalence-based	Contact structure	Individual level	Information as dynamic parameter
60	2012	Mannberg, A.	Risk and rationalization-The role of affect and cognitive dissonance for sexual risk taking	European Economic Review	HIV	STD	Condom use	global	Belief-based	N/A	No disease transmission model	Economic objective function
61	2012	Mao, L. & Yang, Y.	Coupling infectious diseases, human preventive behavior, and networks - A conceptual framework for epidemic modeling	Social Science & Medicine	Influenza	ILI	Prophylactic antivirals	local	Multiple	Model parameters	Individual level	Information threshold
62	2012	Marshall, B. D., et al. (2012)	A complex systems approach to evaluate HIV prevention in metropolitan areas: preliminary implications for combination intervention strategies	PLoS ONE	HIV	STD	IDU substance abuse treatment results in less needle sharing	global	Belief-based	Model parameters	Individual level	Exogenous
63	2012	Morsky, B. & Bauch, C.	Outcome Inelasticity and Outcome Variability in Behaviour-Incidence Models: An Example from an SEIR Infection on a Dynamic Network	Computational and Mathematical Methods in Medicine	Not specified	Other	Vaccination	local	Prevalence-based	Disease state	Individual level	Economic objective function
64	2012	Ndeffo Mbah, M. L. et al.	The impact of imitation on vaccination behavior in social contact networks	PLoS Computational Biology	Not specified	Other	Vaccination	local	Belief-based	Disease state	Individual level	Economic objective function + Economic objective function with imitation
65	2012	Poletti, P. et al.	Risk perception and effectiveness of uncoordinated behavioral responses in an emerging epidemic	Mathematical Biosciences	ILI	ILI	Social distancing	Global	Belief-based	Disease state	Population level	Economic objective function with imitation
66	2012	Reniers, G. & Armbruster, B.	HIV Status Awareness, Partnership Dissolution and HIV Transmission in Generalized Epidemics.	PLoS ONE	HIV	STD	Social distancing	local	Prevalence-based	Model parameters	Population level	Information threshold
67	2012	Robinson, K., et al.	The dynamics of sexual contact networks: Effects on disease spread and control.	Theoretical Population Biology	STD	STD	Social distancing	global	Not specified	Contact structure	Individual level	Exogenous
68	2012	Rogers, T. et al.	Stochastic oscillations of adaptive networks: application to epidemic modelling	Journal of Statistical Mechanics: Theory and Experiment	Not specified	Other	Social distancing	local	Prevalence-based	Contact structure	Individual level	Information threshold
69	2012	Ruan, Z. Y. et al.	Epidemic spreading with information-driven vaccination	Physical Review E	Not specified	Other	Vaccination	local	Prevalence-based	Disease state	Individual level	Information as dynamic parameter
70	2012	Rutherford, G. et al.	An agent based model for simulating the spread of sexually transmitted infections	Online Journal of Public Health Informatics	Not specified	STD	Condom use & sexual risk taking	Not specified	Not specified	Model parameters	Individual level	Exogenous
71	2012	Sahneh, F. D. & Scoglio, C. M.	Optimal Information Dissemination in Epidemic Networks	2012 Ieee 51st Annual Conference on Decision and Control (Cdc)	Not specified	Other	General	local	Prevalence-based	Disease state	Individual level	Information as dynamic parameter
72	2012	Sahneh, F. D. et al.	On the existence of a threshold for preventive behavioral responses to suppress epidemic spreading	Scientific Reports	Not specified	Other	General	Local	Prevalence-based	Disease state	Individual level	Information as dynamic parameter
73	2012	Shim, E. et al.	The influence of altruism on influenza vaccination decisions	Journal of the Royal Society Interface	Influenza	ILI	Vaccination	global	Belief-based	Disease state	Population level	Economic objective function
74	2012	Shim, E. et al.	A game dynamic model for vaccine skeptics and vaccine believers: Measles as an example	Journal of Theoretical Biology	Measles	Childhood diseases	Vaccination	global	Belief-based	Disease state	Population level	Economic objective function
75	2012	Valdez, L. D. et al.	Intermittent social distancing strategy for epidemic control	Physical Review E	Not specified	Other	Social distancing	local	Prevalence-based	Contact structure	Individual level	Information threshold
76	2012	Wang, W.	Modeling Adaptive Behavior in Influenza Transmission	Mathematical Modelling of Natural Phenomena	Influenza	ILI	Social distancing	global	Prevalence-based	Model parameters	Population level	Information as dynamic parameter
77	2012	Wells, C. R. & Bauch, C. T.	The impact of personal experiences with infection and vaccination on behaviour-incidence dynamics of seasonal influenza	Epidemics	Influenza	ILI	Vaccination	local	Multiple	Disease state	Individual level	Economic objective function
78	2012	Wu, Q. C. et al.	The impact of awareness on epidemic spreading in networks	Chaos	Not specified	Other	Social distancing	Multiple	Multiple	Model parameters	Individual level	Information as dynamic parameter
79	2012	Xiao, Y. N. et al.	Sliding Mode Control of Outbreaks of Emerging Infectious Diseases	Bulletin of mathematical biology	Not specified	Other	Social distancing	global	Prevalence-based	Model parameters	Population level	Information threshold
80	2012	Zhang, H. F. et al.	Rational behavior is a 'double-edged sword' when considering voluntary vaccination	Physica A	ILI	ILI	Vaccination	local	Multiple	Disease state	Individual level	Economic objective function with imitation
81	2012	Zhang, H. F. et al.	Modeling the influence of information on the coevolution of contact networks and the dynamics of infectious diseases	Physica D	Not specified	Other	Social distancing	Global	Prevalence-based	Contact structure	Individual level	Information as dynamic parameter
82	2013	Aadland, D. et al.	Syphilis Cycles	B E Journal of Economic Analysis & Policy	Syphilis	STD	Social distancing	global	Prevalence-based	Model parameters	Population level	Economic objective function
83	2013	Buonomo, B. et al.	Modeling of pseudo-rational exemption to vaccination for SEIR diseases	Journal of Mathematical Analysis and Applications	Not specified	Other	Vaccination	global	Multiple	Disease state	Population level	Information as dynamic parameter
84	2013	Campbell, E. & Salathé, M.	Complex social contagion makes networks more vulnerable to disease outbreaks	Scientific Reports	Not specified	Other	Vaccination	Multiple	Belief-based	Disease state	Individual level	Information threshold
85	2013	Cardillo, A. et al.	Evolutionary vaccination dilemma in complex networks	Physical Review E	influenza	ILI	Vaccination	local	Belief-based	Disease state	Individual level	Economic objective function with imitation
86	2013	Chen, F. et al.	Behavioral Responses to Epidemics in an Online Experiment: Using Virtual Diseases to Study Human Behavior	PLoS ONE	Not specified	General	General	global	Prevalence-based	Disease state	Individual level	Economic objective function
87	2013	Cohen, M. J. et al.	Vaccination, Herd Behavior, and Herd Immunity	Medical Decision Making	Influenza	ILI	Vaccination	Multiple	Belief-based	Disease state	Population level	Economic objective function
88	2013	Del Valle, S. Y. et al.	Mathematical Models of Contact Patterns between Age Groups for Predicting the Spread of Infectious Diseases	Mathematical biosciences and engineering	Smallpox-like disease	Other	Social distancing	global	prevalence-based	Model parameters	Population level	Exogenous
89	2013	Fierro, A. & Liccardo, A.	Lattice Model for Influenza Spreading with Spontaneous Behavioral Changes	PLoS ONE	Influenza	ILI	General	Multiple	Multiple	Model parameters	Individual level	Information as dynamic parameter + information threshold
90	2013	Greer, A. L.	Can informal social distancing interventions minimize demand for antiviral treatment during a severe pandemic?	BMC Public Health	Influenza	ILI	Social distancing	global	Prevalence-based	Model parameters	Population level	Exogenous
91	2013	He, D. et al.	Inferring the causes of the three waves of the 1918 influenza pandemic in England and Wales	Proceedings of the Royal Society B	Influenza	ILI	Social distancing	global	Belief-based	Model parameters	Population level	Information as dynamic parameter
92	2013	Juher, D. et al.	Outbreak analysis of an SIS epidemic model with rewiring	Journal of Mathematical Biology	Not specified	Other	Social distancing	local	Prevalence-based	Contact structure	Individual level	Information threshold
93	2013	Liu, M. X. et al.	SIS model on homogeneous networks with threshold type delayed contact reduction	Computers & Mathematics with Applications	Not specified	Other	Social distancing	global	Prevalence-based	Contact structure	Individual level	Information threshold
94	2013	Liu, W. B.	A SIRS Epidemic Model Incorporating Media Coverage with Random Perturbation	Abstract and Applied Analysis	Not specified	Other	Social distancing	Global	Prevalence-based	Model parameters	Population level	Information as dynamic parameter
95	2013	Miller, J. C.	Co-circulation of infectious diseases on networks	Physical Review E	Not specified	Other	General	local	Multiple	Disease state	Individual level	Information as dynamic parameter
96	2013	Misra, A. K. et al.	A Mathematical Model for Control of Vector Borne Diseases through Media Campaigns	Discrete and Continuous Dynamical System Series B	Malaria	VBD	Mosquito prevention (bed nets etc.) & reduction of mosquito breeding sites	global	Belief-based	Disease state	Population level	Information as dynamic parameter
97	2013	Morin, B. R. et al.	Sir Dynamics with Economically Driven Contact Rates	Natural Resource Modeling	ILI	ILI	Social distancing	Global	Prevalence-based	Model parameters	Population level	Economic objective function
98	2013	Mummert, A. & Weiss, H.	Get the News Out Loudly and Quickly: The Influence of the Media on Limiting Emerging Infectious Disease Outbreaks	PLoS ONE	Influenza	ILI	Social distancing	global	Prevalence-based	Disease state	Population level	Information as dynamic parameter
99	2013	Nicolaides, C. et al.	The price of anarchy in mobility-driven contagion dynamics	Journal of the Royal Society Interface	Not specified	Other	Social distancing	Multiple	Belief-based	Contact structure	Metapopulation	Economic objective function
100	2013	Noble, C. et al.	The Role of Caretakers in Disease Dynamics	Journal of Statistical Physics	Not specified	Other	Social distancing	local	Prevalence-based	Contact structure	Individual level	Information threshold
101	2013	Parikh, N. et al.	Modeling the effect of transient populations on epidemics in Washington DC.	Scientific Reports	ILI	ILI	Hygiene measures	global	Belief-based	Model parameters	Population level + Individual level	Exogenous
102	2013	Reluga, T. C.	Equilibria of an epidemic game with piecewise linear social distancing cost	Bulletin of mathematical biology	Not specified	Other	General	global	Prevalence-based	Model parameters	Population level	Economic objective function
103	2013	Reluga, T. C. & Li, J.	Games of age-dependent prevention of chronic infections by social distancing	Journal of Mathematical Biology	HIV	STD	Social distancing	global	Prevalence-based	Model parameters	Population level	Economic objective function
104	2013	Samanta, S. et al.	Effect of awareness programs by media on the epidemic outbreaks: A mathematical model	Applied Mathematics and Computation	Not specified	Other	Social distancing	global	Prevalence-based	Disease state	Population level	Information as dynamic parameter
105	2013	Schumm, P. et al.	Impact of Preventive Behavioral Responses to Epidemics in Rural Regions	2013 International Conference on Computational Science	Not specified	Other	Social distancing	local	Prevalence-based	Model parameters	Individual level	Information threshold
106	2013	Shang, Y. L.	Modeling epidemic spread with awareness and heterogeneous transmission rates in networks	Journal of Biological Physics	Not specified	Other	General	Multiple	Prevalence-based	Model parameters	Individual level	Information as dynamic parameter
107	2013	Tully, S. et al.	Coevolution of risk perception, sexual behaviour, and HIV transmission in an agent-based model	Journal of Theoretical Biology	HIV	STD	Sexual risk taking & Social distancing	Multiple	Multiple	Model parameters	Individual level	Economic objective function
108	2013	Valdez, L. D. et al.	Temporal percolation of a susceptible adaptive network	Physica A	Not specified	Other	Social distancing	local	Prevalence-based	Contact structure	Individual level	Information threshold
109	2013	Wang, L. Y. et al.	Stochastic Extinction in an SIRS Epidemic Model Incorporating Media Coverage	Abstract and Applied Analysis	Not specified	Other	Social distancing	global	Prevalence-based	Model parameters	Population level	Information as dynamic parameter
110	2013	Wang, Y. et al.	Impact of media coverage on epidemic spreading in complex networks	Physica A	Not specified	Other	Social distancing	global	Prevalence-based	Model parameters	Individual level	Information as dynamic parameter
111	2013	Wells, C. R. et al.	Policy Resistance Undermines Superspreader Vaccination Strategies for Influenza	PLoS Computational Biology	Influenza	ILI	Vaccination	Multiple	Multiple	Disease state	Individual level	Economic objective function with imitation
112	2013	Wu, Q. C. et al.	Dynamical diversity induced by individual responsive immunization	Physica A	Not specified	Other	Vaccination	local	Multiple	Disease state	Individual level	Information threshold
113	2013	Wu, Z. X. & Zhang, H. F.	Peer pressure is a double-edged sword in vaccination dynamics	EPL	ILI	ILI	Vaccination	local	Belief-based	Disease state	Individual level	Economic objective function with imitation
114	2013	Xia, S. & Liu, J. M.	A Computational Approach to Characterizing the Impact of Social Influence on Individuals' Vaccination Decision Making	PLoS ONE	ILI	ILI	Vaccination	local	Belief-based	Disease state	Individual level	Economic objective function with imitation
115	2013	Yuan, X. P. et al.	Analysis of an epidemic model with awareness programs by media on complex networks	Chaos, Solitons & Fractals	Not specified	Other	General	global	Prevalence-based	Disease state	Individual level	Information as dynamic parameter
116	2013	Zhang, H. F. et al.	Braess's Paradox in Epidemic Game: Better Condition Results in Less Payoff	Scientific Reports	ILI	ILI	General	local	Belief-based	Model parameters	Individual level	Economic objective function with imitation
117	2013	Zhang, Y.	The impact of other-regarding tendencies on the spatial vaccination game	Chaos, Solitons & Fractals	Influenza	ILI	Vaccination	local	Belief-based	Disease state	Individual level	Economic objective function with imitation
118	2013	Zhong, W. et al.	Modeling dynamics of an influenza pandemic with heterogeneous coping behaviors: case study of a 2009 H1N1 outbreak in Arizona	Computational and Mathematical Organization Theory	Influenza	ILI	Social distancing	global	Prevalence-based	Disease state	Population level	Information as dynamic parameter
119	2014	Althouse, B. M. & Hebert-Dufresne, L.	Epidemic cycles driven by host behaviour	Journal of the Royal Society Interface	Syphilis & Gonorrhea	STD	Social distancing	local	Prevalence-based	Contact structure	Individual level	Information threshold
120	2014	Cai, C. R. et al.	Effect of vaccination strategies on the dynamic behavior of epidemic spreading and vaccine coverage	Chaos, Solitons & Fractals	Not specified	Other	Vaccination	local	Prevalence-based	Disease state	Individual level	Economic objective function with imitation
121	2014	Cao, L.	Infection dynamics in structured populations with disease awareness based on neighborhood contact history	European Physical Journal B	Not specified	Other	Social distancing	local	Prevalence-based	Model parameters	Individual level	Information as dynamic parameter
122	2014	Fukuda, E. et al.	Risk assessment for infectious disease and its impact on voluntary vaccination behavior in social networks	Chaos, Solitons & Fractals	Influenza	ILI	Vaccination	Local	Prevalence-based	Disease state	Individual level	Economic objective function with imitation
123	2014	Han, D. & Sun, M.	Can memory and conformism resolve the vaccination dilemma?	Physica A	Influenza	ILI	Vaccination	local	Belief-based	Disease state	Individual level	Economic objective function with imitation
124	2014	Li, Y. F. et al.	The Effect of Impulsive Vaccination on Delayed SEIRS Epidemic Model Incorporating Saturation Recovery	Discrete Dynamics in Nature and Society	Not specified	Other	Social distancing	global	Belief-based	Model parameters	Population level	Information as dynamic parameter
125	2014	Liao, C. M. & You, S. H.	Assessing risk perception and behavioral responses to influenza epidemics: linking information theory to probabilistic risk modeling	Stochastic Environmental Research and Risk Assessment	Influenza	ILI	Prophylactic antivirals & vaccination	Multiple	Multiple	Disease state	Individual level	Information as dynamic parameter
126	2014	Mei, S. et al.	Individual Decision Making Can Drive Epidemics: A Fuzzy Cognitive Map Study	Ieee Transactions on Fuzzy Systems	Influenza	ILI	Hygiene measures, prophylactic antivirals, social distancing & vaccination	Multiple	Multiple	Model parameters	Individual level	Information as dynamic parameter
127	2014	Morin, B. R. et al.	Disease risk mitigation: The equivalence of two selective mixing strategies on aggregate contact patterns and resulting epidemic spread	Journal of Theoretical Biology	Not specified	Other	Social distancing	global	Prevalence-based	Model parameters	Population level	Economic objective function
128	2014	Oraby, T. et al.	The influence of social norms on the dynamics of vaccinating behaviour for paediatric infectious diseases	Proceedings of the Royal Society B	Pertussis	Childhood diseases	Vaccination	global	Belief-based	Disease state	Population level	Economic objective function with imitation
129	2014	Pawelek, K. A. et al.	Modeling the Impact of Twitter on Influenza Epidemics	Mathematical biosciences and engineering	Influenza	ILI	General	global	Prevalence-based	Model parameters	Population level	Information as dynamic parameter
130	2014	Samanta, S. & Chattopadhyay, J.	Effect of awareness program in disease outbreak - A slow-fast dynamics	Applied Mathematics and Computation	Not specified	Other	General	global	Prevalence-based	Model parameters	Population level	Information as dynamic parameter
131	2014	Sharma, A. & Misra, A. K.	Modeling the Impact of Awareness Created by Media Campaigns on Vaccination Coverage in a Variable Population	Journal of biological systems	Hepatitis B	Other	Social distancing & vaccination	global	Prevalence-based	Disease state	Population level	Information as dynamic parameter
132	2014	Tunc, I. & Shaw, L. B.	Effects of community structure on epidemic spread in an adaptive network	Physical Review E	Not specified	Other	Social distancing	local	Prevalence-based	Contact structure	Individual level	Information threshold
133	2014	Viljoen, T. et al.	Modelling the Impact of HIV on the Populations of South Africa and Botswana	Acta Biotheoretica	HIV	STD	Social distancing	global	Prevalence-based	Model parameters	Population level	Information as dynamic parameter
134	2014	Wang, Z. G., et al.	Multiple effects of self-protection on the spreading of epidemics	Chaos, Solitons & Fractals	ILI	ILI	Hygiene measures & social distancing	local	Belief-based	Model parameters	Individual level	Economic objective function
135	2014	Wu, Q. C. et al.	Responsive immunization and intervention for infectious diseases in social networks	Chaos	Not specified	Other	Vaccination	local	Prevalence-based	Disease state	Individual level	Information as dynamic parameter
136	2014	Xia, S. & Liu, J. M.	A belief-based model for characterizing the spread of awareness and its impacts on individuals' vaccination decisions	Journal of the Royal Society Interface	Influenza	ILI	Vaccination	local	Belief-based	Disease state	Population level	Information as dynamic parameter
137	2014	Xu, F. & Cressman, R.	Disease Control through Voluntary Vaccination Decisions Based on the Smoothed Best Response	Computational and Mathematical Methods in Medicine	Not specified	Other	Vaccination	global	Prevalence-based	Disease state	Population level	Economic objective function with imitation
138	2014	Zhang, H. F. et al.	Effects of behavioral response and vaccination policy on epidemic spreading - an approach based on evolutionary-game dynamics	Scientific Reports	ILI	ILI	Vaccination	global	Prevalence-based	Model parameters	Individual level	Economic objective function with imitation
139	2014	Zhang, H. F. et al.	Suppression of epidemic spreading in complex networks by local information based behavioral responses	Chaos	Not specified	Other	Social distancing	local	Prevalence-based	Model parameters	Individual level	Information as dynamic parameter
140	2014	Zuo, L. X. & Liu, M. X.	Effect of Awareness Programs on the Epidemic Outbreaks with Time Delay	Abstract and Applied Analysis	Not specified	Other	Social distancing	Global	Prevalence-based	Disease state	Population level	Information as dynamic parameter
141	2015	Andrews, M. A. & Bauch, C. T.	Disease Interventions Can Interfere with One Another through Disease-Behaviour Interactions	PLoS Computational Biology	Influenza	ILI	Prophylactic antivirals & vaccination	local	Multiple	Disease state + model parameters	Individual level	Economic objective function
142	2015	Bayham, J. et al.	Measured voluntary avoidance behaviour during the 2009 A/H1N1 epidemic	Proceedings of the Royal Society B	Influenza	ILI	Social distancing	global	Multiple	Model parameters	Metapopulation	Information as dynamic parameter
143	2015	Bhattacharyya, S. et al.	Role of word-of-mouth for programs of voluntary vaccination: A game-theoretic approach	Mathematical Biosciences	Not specified	Other	Vaccination	global	Multiple	Disease state	Population level	Economic objective function
144	2015	Bichara, D. et al.	SIS and SIR Epidemic Models Under Virtual Dispersal	Bulletin of mathematical biology	Not specified	Other	Social distancing	global	Prevalence-based	Model parameters	Metapopulation	Information as dynamic parameter
145	2015	Collinson, S. et al.	The Effects of Media Reports on Disease Spread and Important Public Health Measurements	PLoS ONE	Influenza	ILI	General	global	Prevalence-based	Disease state	Individual level	Information as dynamic parameter
146	2015	Dong, C. et al.	Can rewiring strategy control the epidemic spreading?	Physica A	Not specified	Other	Social distancing & vaccination	local	Prevalence-based	Contact structure + Disease state	Individual level	Economic objective function with imitation + Information threshold
147	2015	Fast, S. M. et al.	The Role of Social Mobilization in Controlling Ebola Virus in Lofa County, Liberia	PLoS Currents Outbreaks	Ebola	Other	Social distancing	global	Belief-based	Model parameters	Individual level	Information as dynamic parameter
148	2015	Fukuda, E. et al.	Influence of breaking the symmetry between disease transmission and information propagation networks on stepwise decisions concerning vaccination	Chaos, Solitons & Fractals	ILI	ILI	Vaccination	local	Belief-based	Disease state	Individual level	Economic objective function with imitation
149	2015	Goyal, S. & Vigier, A.	Interaction, protection and epidemics	Journal of Public Economics	Not specified	Other	General	global	Prevalence-based	Disease state + model parameters	Individual level	Economic objective function
150	2015	Greenhalgh, D. et al.	Awareness programs control infectious disease - Multiple delay induced mathematical model	Applied Mathematics and Computation	Pneumococcus	Other	Social distancing	global	Prevalence-based	Disease state	Population level	Information as dynamic parameter
151	2015	Guo, Q. T. et al.	Two-stage effects of awareness cascade on epidemic spreading in multiplex networks	Physical Review E	Not specified	Other	General	local	Multiple	Disease state	Individual level	Information threshold
152	2015	Han, D. et al.	Epidemic process on activity-driven modular networks	Physica A	Not specified	Other	Vaccination	local	Prevalence-based	Disease state	Individual level	Information as dynamic parameter
153	2015	Helbing, D. et al.	Saving Human Lives: What Complexity Science and Information Systems can Contribute	Journal of Statistical Physics	Not specified	Other	Vaccination	local	Prevalence-based	Disease state	Individual level	Economic objective function
154	2015	Joshi, H. R. et al.	Optimal Control of an Sir Model with Changing Behavior through an Education Campaign	Electronic Journal of Differential Equations	Not specified	Other	General	global	Belief-based	Disease state	Population level	Exogenous
155	2015	Juher, D. et al.	Analysis of an epidemic model with awareness decay on regular random networks	Journal of Theoretical Biology	Not specified	Other	General	local	Prevalence-based	Disease state	Individual level	Information threshold
156	2015	Karimi, E. et al.	Effect of individual protective behaviors on influenza transmission: an agent-based model	Health Care Management Science	Influenza	ILI	Social distancing & vaccination	global	Belief-based	Model parameters	Individual level	Exogenous
157	2015	Kassa, S. M. & Ouhinou, A.	The impact of self-protective measures in the optimal interventions for controlling infectious diseases of human population	Journal of Mathematical Biology	HIV	STD	General	Multiple	Prevalence-based	Disease state	Population level	Information as dynamic parameter
158	2015	Laguzet, L. & Turinici, G.	Individual Vaccination as Nash Equilibrium in a SIR Model with Application to the 2009-2010 Influenza A (H1N1) Epidemic in France	Bulletin of mathematical biology	Influenza	ILI	Vaccination	global	Belief-based	Disease state	Population level	Economic objective function
159	2015	Li, J. et al.	Bifurcation of an SIS model with nonlinear contact rate	Journal of Mathematical Analysis and Applications	Not specified	Other	Social distancing	global	Prevalence-based	Model parameters	Population level	Information as dynamic parameter
160	2015	Liang, Y. H. & J. Juang, J.	The impact of vaccine failure rate on epidemic dynamics in responsive networks	Chaos	Not specified	Other	Vaccination	Multiple	Multiple	Disease state	Individual level	Information as dynamic parameter
161	2015	Liao, C. M. et al.	Network information analysis reveals risk perception transmission in a behaviour-influenza dynamics system	Epidemiology and Infection	influenza	ILI	general	global	Multiple	Disease state	Individual level	Information as dynamic parameter
162	2015	Liu, C. et al.	Interplay between the local information based behavioral responses and the epidemic spreading in complex networks	Chaos	Not specified	Other	General	local	Prevalence-based	Disease state	Individual level	Information threshold
163	2015	Liu, M. X. et al.	Endemic Bubbles Generated by Delayed Behavioral Response: Global Stability and Bifurcation Switches in an Sis Model	Siam Journal of Applied Mathematics	Not specified	Other	Social distancing & general	global	Prevalence-based	Model parameters	Population level	Information as dynamic parameter
164	2015	Liu, S. H. et al.	Global Dynamics of Avian Influenza Epidemic Models with Psychological Effect	Computational and Mathematical Methods in Medicine	Influenza	ILI	Social distancing	global	Prevalence-based	Model parameters	Population level	Information as dynamic parameter
165	2015	Liu, W. B. & Zheng, Q. B.	A stochastic SIS epidemic model incorporating media coverage in a two patch setting	Applied Mathematics and Computation	Not specified	Other	Social distancing	global	Prevalence-based	Model parameters	Metapopulation	Information as dynamic parameter
166	2015	Lubuma, J. M. S. & Terefe, Y. A.	A nonstandard Volterra difference equation for the SIS epidemiological model	Revista De La Real Academia De Ciencias Exactas Fisicas Y Naturales Serie a-Matematicas	Not specified	Other	Social distancing	global	Prevalence-based	Model parameters	Population level	Information as dynamic parameter
167	2015	Misra, A. K. et al.	Stability analysis and optimal control of an epidemic model with awareness programs by media	Biosystems	Not specified	Other	Social distancing	global	Prevalence-based	Disease state	Population level	Information as dynamic parameter
168	2015	Oraby, T. & Bauch, C. T.	Bounded rationality alters the dynamics of paediatric immunization acceptance	Scientific Reports	Not specified	Childhood diseases	Vaccination	global	Multiple	Disease state	Population level	Economic objective function with imitation
169	2015	Sega, L. et al.	The effect of risk-taking behaviour in epidemic models	Journal of Biological Dynamics	Not specified	Other	General	global	Multiple	Model parameters	Population level	Information as dynamic parameter
170	2015	Shang, Y. L.	Degree distribution dynamics for disease spreading with individual awareness	Journal of Systems Science & Complexity	Not specified	Other	General	local	Multiple	Model parameters	Individual level	Information as dynamic parameter
171	2015	Springborn, M. et al.	Accounting for behavioral responses during a flu epidemic using home television viewing	BMC Infectious Diseases	Influenza	ILI	Social distancing	global	Not specified	Model parameters	Population level	Exogenous
172	2015	Sykes, D. & Rychtar, J.	A game-theoretic approach to valuating toxoplasmosis vaccination strategies	Theoretical Population Biology	Toxoplasmosis	Other	Vaccination (of cats)	global	Belief-based	Disease state	Population level	Economic objective function
173	2015	Szabo-Solticzky, A. et al.	Oscillating epidemics in a dynamic network model: stochastic and mean-field analysis	Journal of Mathematical Biology	Not specified	Other	Social distancing	local	Prevalence-based	Contact structure	Individual level	Information threshold
174	2015	Tully, S. et al.	Sexual behavior, risk perception, and HIV transmission can respond to HIV antiviral drugs and vaccines through multiple pathways	Scientific Reports	HIV	STD	Sexual risk taking	local	Belief-based	Model parameters	Individual level	Economic objective function
175	2015	Voinson, M. et al.	Beyond Rational Decision-Making: Modelling the Influence of Cognitive Biases on the Dynamics of Vaccination Coverage	PLoS ONE	Not specified	Other	Vaccination	global	Belief-based	Disease state	Population level	Information as dynamic parameter + economic objective function
176	2015	Wang, Q. et al.	Interaction of Media and Disease Dynamics and Its Impact on Emerging Infection Management	Discrete and Continuous Dynamical System Series B	Not specified	Other	Social distancing	global	Prevalence-based	Disease state	Population level	Information as dynamic parameter
177	2015	Wang, X. et al.	Influence of human behavior on cholera dynamics	Mathematical Biosciences	Cholera	Other	Social distancing	global	Prevalence-based	Model parameters	Population level	Information as dynamic parameter
178	2015	Xiao, Y. et al.	Media impact switching surface during an infectious disease outbreak	Scientific Reports	Influenza	ILI	General	global	Prevalence-based	Model parameters	Population level	Information as dynamic parameter
